# Supplementary material
Source: PubMed Central journal article supplement (PMC3193227)

# Supporting Information

Crawford et al. 10.1073/pnas.1108495108

## SI Materials and Methods

**Bacterial Strains and Growth Conditions.** Unless otherwise noted, *B. anthracis* Sterne strain 7702 (pXO1<sup>+</sup> pXO2<sup>-</sup>) vegetative bacilli (BEI Resources) were cultured at 37 °C with shaking in brain-heart infusion (BHI) medium. Stationary phase bacilli were prepared from liquid cultures grown overnight (12–16 h incubation); log phase organisms were prepared after subculture and were harvested at an optical density of  $\approx 0.6$  at 600 nm. *B. anthracis* spores were prepared in Difco sporulation medium and were purified over a Percoll gradient as described (1). The *E. coli* strain Alpha-select was grown in Luria-Bertani (LB) medium for use in plasmid construction and propagation; *E. coli* strain GM119 was similarly cultured and used to produce unmethylated DNA for *B. anthracis* transformation. The following antibiotics were included in growth medium as appropriate: erythromycin, 1–5  $\mu\text{g/mL}$ ; lincomycin, 2.5  $\mu\text{g/mL}$ ; tetracycline, 5  $\mu\text{g/mL}$ ; kanamycin, 20  $\mu\text{g/mL}$  (*E. coli*) and 100  $\mu\text{g/mL}$  (*B. anthracis*).

**Transposon Library Generation, Insertion Site Determination, and Phage-Transduction.** For library generation, 1  $\mu\text{g}$  of unmethylated pJZ037 was added to 0.2 mL of electrocompetent *B. anthracis*, prepared as described (2). Suspensions were incubated in a 0.2-cm gap electroporation cuvette on ice for 15 min before being exposed to a single 2.5-kV, 25- $\mu\text{F}$ , 200- $\Omega$  pulse from a BioRad Genepulser XCell. Immediately, 1 mL of BGGM medium (BHI supplemented with 10% glycerol, 0.4% glucose, and 10 mM  $\text{MgCl}_2$ ) was added to the cells; transformation cultures were incubated at 30 °C with shaking for 1.5 h before being plated onto BHI agar. After incubation overnight at 30 °C, the bacterial lawn was replica plated onto BHI agar plates containing erythromycin and lincomycin by using sterile felt and incubated overnight at 30 °C. The following day, transformants were replica plated a second time as above, but then incubated at 42 °C overnight to eliminate the temperature-sensitive plasmid pJZ037 and select those bacteria that had transposition of the transposon-associated antibiotic resistance cassette into the chromosome. The resulting bacterial lawn was harvested by washing the plate with BHI medium containing erythromycin and lincomycin; glycerol was added to 10%, and the transposon mutant library was stored at –80 °C. The library was initially assessed by isolating DNA from 20 individual colonies and identifying the transposon insertion sites by PCR as discussed below.

Transposon insertion sites were identified by using a described method (3) with modification. Chromosomal DNA from each Tnx mutant was isolated by using the GenElute bacterial genomic DNA kit (Sigma-Aldrich) according to the manufacturer's instructions for Gram-positive bacterial preparation. DNA was digested with HinPII and ligated with a partially double stranded Y-linker, prepared as described (3). After MinElute purification (Qiagen), an initial PCR was performed to enrich for single-stranded DNA fragments flanking the transposon insertion; 20- $\mu\text{L}$  reactions were prepared by using GoTaq Green Master Mix (Promega) and 0.5  $\mu\text{M}$  primer FIG6 (AACATGACGAATCCCTCCTTCT) and FIG7 (GCCTACGGGGAATTTGTATCG). Reactions were incubated at 95 °C for 3 min; incubated at 94 °C for 1 min, 61 °C for 45 sec, and 72 °C for 1 min ( $\times 20$  cycles); and then incubated at 72 °C for 7 min. Subsequently, 0.5  $\mu\text{M}$  primer JZ99 (ACTACGCACCGGACGAGACGT) was added for double-stranded amplification, and reaction volumes were increased to 100  $\mu\text{L}$  total with fresh GoTaq Green Master Mix. PCR amplification was then repeated as described above, except that the number of cycles was increased from 20 to 25.

PCRs were run out on a 1.5% agarose gel; visible products were excised and purified by using the QIAquick gel extraction kit (Qiagen). Twenty nanograms of DNA per 100 bp of PCR product was submitted to the University of Virginia Biomolecular Research Facility for sequencing with primers FIG6 and FIG7.

Phage transduction was performed by using the bacteriophage CP-51ts45 according to the method of Giorno et al. (4). Tnx18 was used as the donor strain and Sterne as the recipient strain. Infected recipient cells were plated onto BHI plates supplemented with erythromycin to select those cells containing the transduced transposon-associated antibiotic resistance cassette.

**Antimicrobial Assays and Microscopic Visualization.** *B. anthracis* bacilli ( $\approx 3 \times 10^4$  total per sample well) or spores ( $\approx 1 \times 10^5$  total per sample well) were treated with individual chemokines reconstituted in sterile water stabilized with 0.3% human serum albumin (ZLB Bioplasma AG) or an equal volume of 0.3 % human serum albumin (vehicle, untreated control). Also, where indicated, *B. anthracis* vegetative cells were treated with protamine (Sigma) reconstituted in sterile water (5). Alamar blue reduction and cfu determination were performed 6 h after treatment as described (6). Light microscopy was used for bacterial cell visualization; camera control and image capture were performed by using QCapture Pro-5.1 software as described (6).

**Markerless Gene Deletion and Complementation.** Deletion of *ftsX* was performed as described in detail (7). Briefly, *ftsX* gene replacement constructs were cloned into plasmid pBKJ236 for integration into the chromosome by homologous recombination; plasmid integrants were isolated by shifting bacterial growth to replication-nonpermissive temperature. Plasmid pBKJ233 was then introduced by electroporation and maintained in the presence of tetracycline to affect allelic exchange. Individual colonies were scored for loss of erythromycin resistance and PCR was used to confirm gene deletion, *ftsX* PCR conditions are included below. Plasmid pBKJ233 was then lost spontaneously through passage in medium lacking tetracycline.

For *ftsX* complementation, the native *B. anthracis* Sterne strain *ftsX* gene (BAS5033), carrying its native ribosomal binding site, was amplified by using Phusion high fidelity polymerase (New England BioLabs) according to the manufacturer's instructions and using primer MCX1 containing a SphI restriction site (GCCTAGGCATGCAGCGTGTGATGCCTTTACCT) and primer MCX3 containing a PspXI restriction site (CCGGATACTCGAGTTCGGAAAAATTGTTTCGAGATGA); PCR cycle conditions: 98 °C for 30 sec; 98 °C for 10 sec, 66 °C for 20 sec, and 72 °C for 30 sec ( $\times 30$  cycles); and then 72 °C for 7 min. The *ftsX* amplification products were double-digested with SphI-HF and PspXI, purified, and ligated into pUTE973 (8) that had been digested with SphI-HF and SalI-HF (leaves a cohesive end compatible with PspXI). The prepared vector was transformed into Alpha-select *E. coli* for propagation; the cloning site was sequenced for appropriate *ftsX* insertion and, subsequently, transformed into GM119 *E. coli*. This *ftsX* complementation vector (pUVA113) and the empty vector control (pUTE973) were isolated from GM119 transformants grown in the presence of kanamycin by using the QIAprep spin miniprep kit (Qiagen) and individually transformed into *B. anthracis*  $\Delta\text{ftsX}$  bacilli as described above. Diagnostic PCR and sequencing of the plasmid cloning sites were used to validate *B. anthracis* transformants.





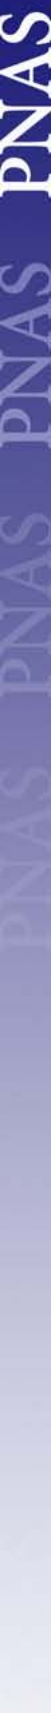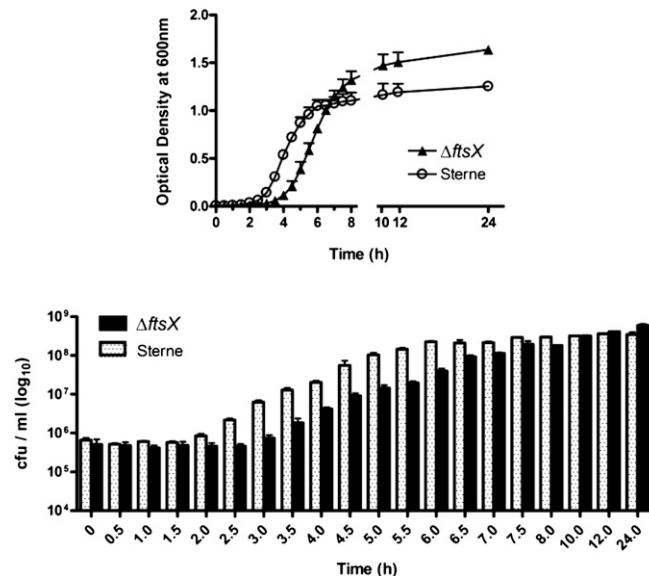

Supplement: 1108495108_pnas.201108495SI.pdf [file 1108495108_pnas.201108495SI.pdf]
